# Supplementary material for: Utilizing network pharmacology and experimental validation to investigate the underlying mechanism of phellodendrine on inflammation
Source: PeerJ. 2022 Sep 23;10:e13852. doi: 10.7717/peerj.13852 (PMC9512003; doi:10.7717/peerj.13852)
Supplement: Supplemental Information 1 [file peerj-10-13852-s001.xlsx]

## Sheet: Sheet1
Two database targets of Phellodendron 00291	Target of Inflammatation
PTGS1	IL6		12 common elements in "Phellodendrine" and "Inflammation":
CHRM3	TNF		PTGS1
KCNH2	IL10		PTGS2
CHRM1	TLR4		ADRB2
SCN5A	NLRP3		F3
CHRM5	NOD2		HTR1A
PTGS2	TLR2		DPP4
CA2	HLA-DRB1		ESR1
CHRM4	IL1RN		ABCC1
ADRA1B	CRP		ABCB1
ADRB2	PRTN3		JUN
OPRM1	IL13		ABCG2
HSP90AB1	HLA-B		PIK3CA
IGHG1	TNFRSF1A
NCOA2	CXCL8
NCOA1	MEFV
CALM1	ELANE
DRD1	IL1B
DRD2	CTLA4
F3	FOXP3
DRD3	IL23R
SIGMAR1	FAS
DRD5	TGFB1
DRD4	PTPN22
HTR1A	TLR3
ADRA1D	IL10RA
ADRA1A	STAT1
ADRB1	IL17A
DHCR7	CCR5
TBXA2R	STAT3
HTR7	IFNG
MAOA	CD40LG
SLC6A3	CCL11
RBBP9	FASLG
KCNN1	CCL2
KCNN3	HLA-DQB1
KCNN2	HLA-DPB1
HTR2A	IRF5
ADRB3	NLRP1
ADRA2A	IL4
ADRA2C	MBL2
OPRD1	HLA-A
OPRK1	ALB
MTNR1B	LTA
SLC47A1	CCR6
CHRNA3 CHRNB4	ABCB1
ACHE	STAT4
BCHE	SERPINA1
DPP4	PSTPIP1
HCRTR2	TNFAIP3
CHRNB4 CHRNA2	ITGAM
CHRNA3 CHRNB2	ICAM1
HCRTR1	IL10RB
ESR1	MPO
ESR2	TP53
MTNR1A	CIITA
ABCC1	FCGR2A
ABCB1	MMP1
JUN	IL18
RAF1	HLA-DQA1
HTR6	LACC1
SLC18A2	ITGB2
ESRRA	MVK
ESRRB	IRGM
PTPRCAP	MMP9
SLC9A1	MIR155
CA7	PTGS2
SLC6A4	CCR1
RPS6KB1	HLA-DPA1
AURKA	PLG
HTR2B	IL12RB1
CA1	ERAP1
ERN1	CFTR
AKR1B1	IL1A
AKR1B10	NLRC4
KIF11	IL5
ABCG2	MIR21
PRCP	IL2
CHRNA4 CHRNB2	VCAM1
WEE1	ATG16L1
PSEN2 PSENEN NCSTN APH1A PSEN1 APH1B	MYD88
ASAH1	MIF
CDK5R1 CDK5	SELE
CCNB3 CDK1 CCNB1 CCNB2	SPP1
SLC6A2	NLRP12
PARP1	TNFRSF1B
CHEK1	ADA2
CCNE1 CDK2	IFIH1
DYRK1A	CCL5
HSD17B2	TNFSF15
CCNE1 CDK3	HMGB1
FASN	FCGR3B
CLK1	C4A
EPHB4	CXCL10
DYRK1B	EPX
PIK3CA	BTNL2
TRPM8	CD4
PIM1	FLG
	S100A9
	CD19
	RIPK1
	VEGFA
	IL2RA
	MUC1
	HMOX1
	IL21
	DNASE1
	IL12A
	IL1R1
	RNASE3
	TLR9
	ALOX5
	IRF1
	NFKB1
	IL12B
	TBX21
	AIRE
	C3
	F2
	IKBKB
	CSF2
	SLC22A4
	APOE
	PADI4
	MIR146A
	SMAD3
	CD79A
	INAVA
	CTNNB1
	DNASE1L3
	CCL3
	TTR
	SPINK5
	NOS2
	S100A8
	INS
	FCGR2B
	CD55
	OTULIN
	TGFB2
	PDCD1
	SELP
	ICOSLG
	HAVCR2
	MUC5B
	CASP1
	FOXJ1
	S100A12
	CXCL1
	SAA1
	MMP2
	RASGRP1
	MST1
	TREX1
	SERPINA3
	CXCR3
	BDNF
	PIK3CA
	CTSG
	CCL4
	IFNA1
	WAS
	TLR5
	ADIPOQ
	CAT
	C1S
	IL2RB
	BACH2
	SELL
	IKBKG
	STING1
	CD8A
	TIMP1
	HSPD1
	MIR126
	IL36RN
	MMP3
	IL33
	TNIP1
	CD40
	CSF3
	PPARG
	TNFRSF13C
	AGER
	SPINK1
	CYBA
	CHI3L1
	NCF4
	CCR3
	HLA-G
	IRAK1
	CD28
	IL23A
	MIR145
	TSLP
	CD80
	AKT1
	ACE
	TBK1
	CR2
	PTGS1
	LTF
	CYBB
	IFNB1
	DEFB4A
	IL17F
	GPT
	PTX3
	KNG1
	TERT
	ANXA1
	IL4R
	KLRC4
	IL12A-AS1
	LPL
	ETS1
	UBAC2
	MBTPS2
	IL1RAPL2
	CXCR4
	IL15
	HP
	KRAS
	MIR122
	LEP
	CXCL2
	C4B
	TLR6
	LCN2
	IL7R
	ADA
	SERPINE1
	SH2D1A
	MIR150
	SAMHD1
	TNFSF11
	RELA
	TEK
	NR3C1
	TNFRSF13B
	NCF1
	RBCK1
	PRSS1
	TNFSF12
	CXCL9
	APOH
	CXCL12
	PSMB8
	IL9
	B2M
	ADRB2
	POLA1
	NOD1
	NCF2
	SFTPC
	TNFSF13B
	SLC9A3
	TCF4
	FERMT1
	CASR
	ADAR
	JAK2
	CASP10
	MPZ
	PRKCD
	RETN
	FLNA
	CP
	THBD
	SERPINB1
	TGFBR1
	PTPRC
	CASP3
	FGFR2
	CD44
	ABCB4
	PLA2G2A
	DNAL1
	TLR7
	SFTPA2
	IGHE
	MMEL1
	CD86
	F2RL1
	GZMB
	SCGB1A1
	PPARA
	EPCAM
	TGFBR2
	ITGA4
	GDNF
	EGFR
	ICOS
	NFKBIA
	RET
	CD244
	IL22
	NR1H3
	IL37
	CALCA
	IFNGR1
	RSPH4A
	RSPH9
	PTGDR2
	UBE2L3
	GPR35
	MIR222
	NFKB2
	PIK3CG
	TAC1
	CXCR2
	MAPK8
	MIR34A
	MAPK14
	SOCS3
	FCGR3A
	F5
	TLR1
	ITGB4
	PLA2G7
	NR1H4
	CSF1
	SLPI
	JUN
	CD14
	BPI
	SFTPD
	RNASEH2B
	PTPN2
	ADAM17
	PSMB9
	COL7A1
	ITGAL
	IFNA2
	MMP8
	GGT1
	MRAP
	ACKR2
	GJB2
	TNFRSF11B
	SERPINC1
	VWF
	CCR7
	PRSS2
	F3
	CYBC1
	HLA-C
	PYCARD
	C5
	DNAAF2
	IRAK4
	CFI
	ENG
	KRT18
	SFTPA1
	RNF31
	DDX58
	BLK
	FGFR3
	IL16
	CASP8
	TNFSF4
	LMNA
	C1R
	ABCG2
	MIR200C
	RTEL1
	XIAP
	APOA1
	COL17A1
	CARD14
	IL3
	GATA3
	CX3CL1
	LPIN2
	PLEC
	CD163
	CCL20
	CDH1
	ABCB11
	BGLAP
	CD274
	IL17RA
	MIR132
	CCR4
	CCR2
	CAMP
	TLR8
	RSPH1
	CTRC
	IL6R
	NFE2L2
	RNASEH2A
	RNASEH2C
	CD81
	BTK
	VDR
	IRF3
	COL1A1
	MIR221
	MMP12
	CD69
	FLNC
	TF
	APC
	MTHFR
	NGF
	MIR15B
	REL
	TLR10
	TICAM1
	MAPK1
	H2AC18
	CCL17
	CLEC7A
	AQP4
	EDN1
	DNAI2
	MIR31
	MUC5AC
	IL7
	GHRL
	ELN
	ENO1
	TERC
	DUOX2
	HYDIN
	CXCL13
	VIP
	NME8
	CCDC40
	DRC1
	F13A1
	CXCL5
	PMM2
	CX3CR1
	CD36
	GJB6
	PRF1
	TTC7A
	NPPB
	IDO1
	MIR20A
	TFRC
	WG
	CHUK
	CCL26
	TGFB3
	SLC11A1
	CXCR1
	MIR223
	LAMC2
	PON1
	LBP
	POMC
	LRBA
	C5AR1
	JAK3
	HPS1
	IGF1
	MX1
	DNAAF1
	FGF2
	FOS
	ABCA3
	SELPLG
	CCL7
	DMD
	DNAI1
	CCDC103
	ITGA6
	CD247
	JAK1
	DNAH5
	DNAAF5
	CAPN5
	MIR142
	MIR192
	ZAP70
	MECP2
	IL1RL1
	DNAH11
	CCDC114
	DNAAF3
	CCDC39
	MCIDAS
	COMP
	SOD1
	MBP
	ITGAX
	PSMB4
	WIPF1
	PGM3
	TNFAIP6
	TRPV1
	MIR143
	CCL13
	XDH
	IRF8
	CCL24
	MOG
	SIRT1
	UNC93B1
	IL11
	APOL1
	SAA4
	IL21R
	MMP13
	CALR
	SLC17A5
	HFE
	TYR
	LAMB3
	MIR148A
	SYK
	CCN2
	NLRP6
	GCG
	REG3A
	IL12RB2
	MIR199A1
	SAG
	NOX1
	ATP12A
	STAT6
	HAMP
	CDKN1A
	ARMC4
	ALOX15
	PLCG2
	CPA1
	FBN1
	NCSTN
	TNFRSF10A
	PTH
	NOS3
	TACR1
	DNAH1
	RBP4
	RBP3
	CD27
	MIR125A
	PECAM1
	HIF1A
	CARMIL2
	FGF23
	TRAF3
	BCL2
	ANXA5
	CCNO
	DNAH9
	SPAG1
	ZMYND10
	LRRC6
	CCDC151
	RSPH3
	CFAP298
	A2ML1
	SAMD9
	LAMA3
	ERBB2
	SOCS1
	FGF10
	TYK2
	GAPDH
	USB1
	HGF
	TRIM21
	DPP4
	RELN
	TRAF3IP2
	LRP1
	EGF
	TGM2
	AP1S3
	PDE4A
	CFHR2
	ESR1
	DSP
	TAP1
	TPO
	MTOR
	ATP4A
	MIR17
	HTR1A
	DSG1
	SST
	FAM13A
	IL18R1
	MS4A2
	BANK1
	PTGER2
	TPMT
	IL27
	HAVCR1
	TREM1
	SOD2
	MIR93
	SERPINA6
	POU2AF1
	PTEN
	CCK
	BRCA2
	MICA
	GJA1
	TJP1
	MALAT1
	GFAP
	MIR141
	PSEN1
	RIPK2
	HSPA4
	FCGR1A
	BCL6
	ARG1
	AFP
	KRT8
	TAP2
	PI3
	HRH1
	IL32
	RAC1
	BMP6
	SHARPIN
	CTSC
	SMAD4
	CCL22
	EPRS1
	KLRK1
	CCR9
	CXCL11
	CTSB
	CFH
	DOCK8
	LACTB
	JAZF1
	CREB1
	PRKCQ
	IFNAR1
	MADCAM1
	KRT19
	AIM2
	FN1
	DPYD
	KIAA0319L
	PXK
	CELIAC2
	SLEB3
	CELIAC10
	CELIAC11
	CELIAC12
	CELIAC13
	CELIAC5
	CELIAC6
	CELIAC7
	CELIAC8
	CELIAC9
	SLEB12
	SLEB13
	SLEB14
	SLEB15
	SLEB4
	SLEB5
	SLEB7
	SLEB8
	SULT1A3
	CR1
	UMOD
	LCK
	DEFB1
	COL2A1
	MUC2
	GNE
	TNFRSF4
	HMGCR
	DDX41
	GSTM1
	CD46
	GUSB
	ACVR1
	PRG2
	P2RX7
	HNMT
	SMAD7
	LGALS1
	KRT10
	HSD3B7
	CCL21
	CYSLTR1
	NFKBIL1
	GAS8
	TTC25
	DNAAF4
	MME
	KDR
	CFB
	CARD9
	ACAN
	RARRES2
	PROCR
	CXCR5
	MUC16
	CLC
	AKR1C1
	SLC22A6
	CYP2C19
	CYP2C9
	Prkab1
	EDNRA
	HSPA5
	RPS6KA3
	ERK
	CCND1
	MYC
	PCNA
	CCNA2
	UGT1A6
	NAT2
	SLC22A8
	CYP3A4
	CYP3A5
	PLAU
	CSNK2A1
	KLK6
	PRSS3
	ATOX1
	ECI1
	PRSS
	ST14
	KLK1
	CES2
	DAO
	SLCO2B1
	SLC16A1
	SLC15A1
	KCNN4
	CYP2D6
	CYP2C8
	CYP2B6
	CYP2A6
	CYP2E1
	CYP3A7
	NR1I2
	HCAR2
	SLCO1B1
	SLCO1B3
	NR0B1
	ABCC2
	SLCO1A2
	CYP17A1
	CYP1A1
	CYP3A43
	CYP4A11
	CYP11B1
	HSD11B2
	HSD11B1
	PLAT
	FABP2
	ABCC4
	ABCC1
	SLC22A11
	UGT1A1
	UGT1A3
	UGT1A9
	UGT2B4
	UGT2B7
	GP1BA
	S100A7
	AMACR
	CYP1A2
	SLCO1C1
	CYP2C18
	SCN4A
	ASIC1
	KCNQ2
	KCNQ3
	SMO
	LRP2
	DHFR
	CYP11B2
	SHBG
	HSD3B1
	P-glycoprotein 1
	CYP1B1
	PTGIS
	NAT1、NAT2
	LRRC19
	CGAS
	F10
	ACKR1
	TET2
	ZC3H12A
	C5AR2
	RC3H1
	EIF2AK4
	NAMPT
	SLC39A14
	SELENOS
	ZBP1
	RIPK3
	SIGIRR
	IL27RA
	NMU
	CCL27
	TRPA1
	TNFSF14
	CBLB
	IRAK3
	NR5A2
	SCN10A
	NMUR1
	IL24
	TRPM2
	TNFSF10
	TNFRSF25
	FADD
	BID
	S1PR3
	ANGPT2
	PTGER4
	PGF
	CAV1
	LTBR
	IL11RA
	FABP4
	CRLF2
	XBP1
	ITGAV
	MAP3K8
	CD1D
	F2R
	PTPN6
	SPI1
	MRC1
	LTA4H
	ITGB6
	CRH
