# Supplementary material for: Utilizing network pharmacology and experimental validation to investigate the underlying mechanism of phellodendrine on inflammation
Source: PeerJ. 2022 Sep 23;10:e13852. doi: 10.7717/peerj.13852 (PMC9512003; doi:10.7717/peerj.13852)
Supplement: Supplemental Information 5 [file peerj-10-13852-s005.xlsx]

## Sheet: BP
Category	Term	Count	%	PValue	Genes	List Total	Pop Hits	Pop Total	Fold Enrichment	Bonferroni	Benjamini	FDR
GOTERM_BP_DIRECT	GO:0042493~response to drug	5	41.6667	3.14376e-05	ABCC1, JUN, ABCB1, PTGS2, ABCG2	12	304	16792	23.0154	0.00804703	0.00807945	0.00801658
GOTERM_BP_DIRECT	GO:0045986~negative regulation of smooth muscle contraction	2	16.6667	0.00261796	ADRB2, PTGS2	12	4	16792	699.667	0.49018	0.336407	0.333789
GOTERM_BP_DIRECT	GO:0042908~xenobiotic transport	2	16.6667	0.00457733	ABCB1, ABCG2	12	7	16792	399.81	0.692437	0.391309	0.388263
GOTERM_BP_DIRECT	GO:0019371~cyclooxygenase pathway	2	16.6667	0.00653321	PTGS2, PTGS1	12	10	16792	279.867	0.814471	0.391309	0.388263
GOTERM_BP_DIRECT	GO:0001525~angiogenesis	3	25	0.00892358	JUN, PIK3CA, PTGS2	12	223	16792	18.8251	0.900107	0.391309	0.388263
GOTERM_BP_DIRECT	GO:0001516~prostaglandin biosynthetic process	2	16.6667	0.00913561	PTGS2, PTGS1	12	14	16792	199.905	0.905451	0.391309	0.388263
GOTERM_BP_DIRECT	GO:0006855~drug transmembrane transport	2	16.6667	0.0123799	ABCB1, ABCG2	12	19	16792	147.298	0.959299	0.454519	0.450982
GOTERM_BP_DIRECT	GO:0001662~behavioral fear response	2	16.6667	0.0188395	DPP4, HTR1A	12	29	16792	96.5057	0.992463	0.486334	0.482549
GOTERM_BP_DIRECT	GO:0043542~endothelial cell migration	2	16.6667	0.0188395	DPP4, PIK3CA	12	29	16792	96.5057	0.992463	0.486334	0.482549
GOTERM_BP_DIRECT	GO:0050873~brown fat cell differentiation	2	16.6667	0.0207699	ADRB2, PTGS2	12	32	16792	87.4583	0.995457	0.486334	0.482549
GOTERM_BP_DIRECT	GO:0006810~transport	3	25	0.0208158	ABCC1, ABCB1, ABCG2	12	348	16792	12.0632	0.995511	0.486334	0.482549
GOTERM_BP_DIRECT	GO:0045429~positive regulation of nitric oxide biosynthetic process	2	16.6667	0.0278185	PTGS2, ESR1	12	43	16792	65.0853	0.99929	0.595779	0.591142
GOTERM_BP_DIRECT	GO:0048146~positive regulation of fibroblast proliferation	2	16.6667	0.0348209	JUN, ESR1	12	54	16792	51.8272	0.999889	0.607661	0.602932
GOTERM_BP_DIRECT	GO:0007612~learning	2	16.6667	0.0367226	JUN, PTGS2	12	57	16792	49.0994	0.999933	0.607661	0.602932
GOTERM_BP_DIRECT	GO:0048661~positive regulation of smooth muscle cell proliferation	2	16.6667	0.038621	JUN, PTGS2	12	60	16792	46.6444	0.99996	0.607661	0.602932
GOTERM_BP_DIRECT	GO:0050727~regulation of inflammatory response	2	16.6667	0.040516	PTGS2, ESR1	12	63	16792	44.4233	0.999976	0.607661	0.602932
GOTERM_BP_DIRECT	GO:0008217~regulation of blood pressure	2	16.6667	0.0417774	PTGS2, PTGS1	12	65	16792	43.0564	0.999983	0.607661	0.602932
GOTERM_BP_DIRECT	GO:0001938~positive regulation of endothelial cell proliferation	2	16.6667	0.0442957	JUN, F3	12	69	16792	40.5604	0.999991	0.607661	0.602932
GOTERM_BP_DIRECT	GO:0098869~cellular oxidant detoxification	2	16.6667	0.0449244	PTGS2, PTGS1	12	70	16792	39.981	0.999993	0.607661	0.602932
GOTERM_BP_DIRECT	GO:0001889~liver development	2	16.6667	0.0474352	JUN, PIK3CA	12	74	16792	37.8198	0.999996	0.609542	0.604798
GOTERM_BP_DIRECT	GO:0031295~T cell costimulation	2	16.6667	0.04994	DPP4, PIK3CA	12	78	16792	35.8803	0.999998	0.61117	0.606414
GOTERM_BP_DIRECT	GO:0032355~response to estradiol	2	16.6667	0.0580393	PTGS2, ESR1	12	91	16792	30.7546	1	0.678004	0.672728
GOTERM_BP_DIRECT	GO:0006979~response to oxidative stress	2	16.6667	0.0697638	PTGS2, PTGS1	12	110	16792	25.4424	1	0.779535	0.773469
GOTERM_BP_DIRECT	GO:0043524~negative regulation of neuron apoptotic process	2	16.6667	0.0831738	JUN, PIK3CA	12	132	16792	21.202	1	0.890653	0.883722
GOterm	subgroup	PValue	−Log10(P value)			GOterm	subgroup	−Log10(P value)
response to drug	Biological process	3.14376e-05	4.50255			response to drug	Biological process	4.50255
negative regulation of smooth muscle contraction	Biological process	0.00261796	2.58204			negative regulation of smooth muscle contraction	Biological process	2.58204
xenobiotic transport	Biological process	0.00457733	2.33939			xenobiotic transport	Biological process	2.33939
cyclooxygenase pathway	Biological process	0.00653321	2.18487			cyclooxygenase pathway	Biological process	2.18487
angiogenesis	Biological process	0.00892358	2.04946			angiogenesis	Biological process	2.04946
prostaglandin biosynthetic process	Biological process	0.00913561	2.03926			prostaglandin biosynthetic process	Biological process	2.03926
drug transmembrane transport	Biological process	0.0123799	1.90728			drug transmembrane transport	Biological process	1.90728
behavioral fear response	Biological process	0.0188395	1.72493			behavioral fear response	Biological process	1.72493
endothelial cell migration	Biological process	0.0188395	1.72493			endothelial cell migration	Biological process	1.72493
brown fat cell differentiation	Biological process	0.0207699	1.68257			brown fat cell differentiation	Biological process	1.68257
						plasma membrane	Cellular component	3.24078
						apical plasma membrane	Cellular component	1.89594
						cell surface	Cellular component	1.39091
						ATPase activity, coupled to transmembrane movement of substances	Molecular function	3.44397
						protein homodimerization activity	Molecular function	3.0472
						prostaglandin-endoperoxide synthase activity	Molecular function	2.8851
						xenobiotic-transporting ATPase activity	Molecular function	2.48755
						transporter activity	Molecular function	2.13674
						peroxidase activity	Molecular function	1.84628
						enzyme binding	Molecular function	1.72193
						protein binding	Molecular function	1.35843

## Sheet: CC
Category	Term	Count	%	PValue	Genes	List Total	Pop Hits	Pop Total	Fold Enrichment	Bonferroni	Benjamini	FDR
GOTERM_CC_DIRECT	GO:0005886~plasma membrane	9	75	0.000574406	DPP4, ABCC1, ABCB1, PIK3CA, HTR1A, ADRB2, ESR1, F3, ABCG2	12	4121	18224	3.31667	0.0277613	0.0281459	0.0281459
GOTERM_CC_DIRECT	GO:0016324~apical plasma membrane	3	25	0.0127075	DPP4, ABCB1, ADRB2	12	291	18224	15.6564	0.465625	0.311334	0.311334
GOTERM_CC_DIRECT	GO:0009986~cell surface	3	25	0.0406528	DPP4, ABCB1, F3	12	542	18224	8.4059	0.869138	0.595332	0.595332
GOTERM_CC_DIRECT	GO:0031090~organelle membrane	2	16.6667	0.0512912	PTGS2, PTGS1	12	87	18224	34.9119	0.924227	0.595332	0.595332
GOTERM_CC_DIRECT	GO:0016021~integral component of membrane	7	58.3333	0.0607482	DPP4, ABCC1, ABCB1, ADRB2, ESR1, F3, ABCG2	12	5163	18224	2.05901	0.953621	0.595332	0.595332
GOTERM_CC_DIRECT	GO:0070062~extracellular exosome	5	41.6667	0.075602	DPP4, ABCC1, ABCB1, F3, PTGS1	12	2811	18224	2.70129	0.978763	0.617416	0.617416
GOTERM_CC_DIRECT	GO:0030027~lamellipodium	2	16.6667	0.0924704	DPP4, PIK3CA	12	160	18224	18.9833	0.991387	0.647293	0.647293
GOterm	subgroup	PValue	−Log10(P value)				GOterm	subgroup	−Log10(P value)
plasma membrane	Cellular component	0.000574406	3.24078				plasma membrane	Cellular component	3.24078
apical plasma membrane	Cellular component	0.0127075	1.89594				apical plasma membrane	Cellular component	1.89594
cell surface	Cellular component	0.0406528	1.39091				cell surface	Cellular component	1.39091

## Sheet: MF
Category	Term	Count	%	PValue	Genes	List Total	Pop Hits	Pop Total	Fold Enrichment	Bonferroni	Benjamini	FDR
GOTERM_MF_DIRECT	GO:0042626~ATPase activity, coupled to transmembrane movement of substances	3	25	0.000359773	ABCC1, ABCB1, ABCG2	12	44	16881	95.9148	0.0273271	0.0277025	0.0266232
GOTERM_MF_DIRECT	GO:0042803~protein homodimerization activity	5	41.6667	0.000897021	DPP4, JUN, ADRB2, PTGS2, ABCG2	12	730	16881	9.63527	0.0667681	0.0334399	0.0321371
GOTERM_MF_DIRECT	GO:0004666~prostaglandin-endoperoxide synthase activity	2	16.6667	0.00130285	PTGS2, PTGS1	12	2	16881	1406.75	0.095511	0.0334399	0.0321371
GOTERM_MF_DIRECT	GO:0008559~xenobiotic-transporting ATPase activity	2	16.6667	0.00325424	ABCB1, ABCG2	12	5	16881	562.7	0.221966	0.0626442	0.0602035
GOTERM_MF_DIRECT	GO:0005215~transporter activity	3	25	0.00729894	ABCC1, ABCB1, ABCG2	12	202	16881	20.8923	0.431117	0.112404	0.108024
GOTERM_MF_DIRECT	GO:0004601~peroxidase activity	2	16.6667	0.0142468	PTGS2, PTGS1	12	22	16881	127.886	0.668753	0.182834	0.17571
GOTERM_MF_DIRECT	GO:0019899~enzyme binding	3	25	0.0189703	JUN, PTGS2, ESR1	12	333	16881	12.6734	0.771163	0.208673	0.200543
GOTERM_MF_DIRECT	GO:0005515~protein binding	10	83.3333	0.0438095	DPP4, JUN, ABCB1, PIK3CA, HTR1A, ADRB2, PTGS2, ESR1, F3, ABCG2	12	8785	16881	1.60131	0.968237	0.421666	0.405238
GOTERM_MF_DIRECT	GO:0002020~protease binding	2	16.6667	0.0638981	DPP4, F3	12	101	16881	27.8564	0.993807	0.513735	0.49372
GOTERM_MF_DIRECT	GO:0005524~ATP binding	4	33.3333	0.0667189	ABCC1, ABCB1, PIK3CA, ABCG2	12	1495	16881	3.76388	0.995091	0.513735	0.49372
GOTERM_MF_DIRECT	GO:0042802~identical protein binding	3	25	0.0829332	DPP4, JUN, ESR1	12	749	16881	5.63451	0.998727	0.550297	0.528857
GOTERM_MF_DIRECT	GO:0020037~heme binding	2	16.6667	0.0857606	PTGS2, PTGS1	12	137	16881	20.5365	0.998996	0.550297	0.528857
	GOterm	subgroup	PValue	−Log10(P value)				GOterm	subgroup	−Log10(P value)
	ATPase activity, coupled to transmembrane movement of substances	Molecular function	0.000359773	3.44397				ATPase activity, coupled to transmembrane movement of substances	Molecular function	3.44397
	protein homodimerization activity	Molecular function	0.000897021	3.0472				protein homodimerization activity	Molecular function	3.0472
	prostaglandin-endoperoxide synthase activity	Molecular function	0.00130285	2.8851				prostaglandin-endoperoxide synthase activity	Molecular function	2.8851
	xenobiotic-transporting ATPase activity	Molecular function	0.00325424	2.48755				xenobiotic-transporting ATPase activity	Molecular function	2.48755
	transporter activity	Molecular function	0.00729894	2.13674				transporter activity	Molecular function	2.13674
	peroxidase activity	Molecular function	0.0142468	1.84628				peroxidase activity	Molecular function	1.84628
	enzyme binding	Molecular function	0.0189703	1.72193				enzyme binding	Molecular function	1.72193
	protein binding	Molecular function	0.0438095	1.35843				protein binding	Molecular function	1.35843

## Sheet: KEGG
Category	Term	Count	%	PValue	Genes	List Total	Pop Hits	Pop Total	Fold Enrichment	Bonferroni	Benjamini	FDR
KEGG_PATHWAY	hsa04923:Regulation of lipolysis in adipocytes	4	33.3333	8.05226e-05	PIK3CA, ADRB2, PTGS2, PTGS1	12	56	6879	40.9464	0.00810013	0.00813278	0.00813278
KEGG_PATHWAY	hsa02010:ABC transporters	3	25	0.00212019	ABCC1, ABCB1, ABCG2	12	44	6879	39.0852	0.192948	0.10707	0.10707
KEGG_PATHWAY	hsa04024:cAMP signaling pathway	4	33.3333	0.00326698	JUN, PIK3CA, HTR1A, ADRB2	12	198	6879	11.5808	0.281439	0.109988	0.109988
KEGG_PATHWAY	hsa04915:Estrogen signaling pathway	3	25	0.0103626	JUN, PIK3CA, ESR1	12	99	6879	17.3712	0.650791	0.217243	0.217243
KEGG_PATHWAY	hsa04668:TNF signaling pathway	3	25	0.01203	JUN, PIK3CA, PTGS2	12	107	6879	16.0724	0.705477	0.217243	0.217243
KEGG_PATHWAY	hsa04726:Serotonergic synapse	3	25	0.0129055	HTR1A, PTGS2, PTGS1	12	111	6879	15.4932	0.730704	0.217243	0.217243
KEGG_PATHWAY	hsa05206:MicroRNAs in cancer	3	25	0.0739616	ABCC1, ABCB1, PTGS2	12	286	6879	6.01311	0.999574	0.688081	0.688081
KEGG_PATHWAY	hsa04370:VEGF signaling pathway	2	16.6667	0.0933963	PIK3CA, PTGS2	12	61	6879	18.7951	0.99995	0.688081	0.688081
KEGG_PATHWAY	hsa00590:Arachidonic acid metabolism	2	16.6667	0.0933963	PTGS2, PTGS1	12	61	6879	18.7951	0.99995	0.688081	0.688081
KEGG_PATHWAY	hsa05210:Colorectal cancer	2	16.6667	0.094859	JUN, PIK3CA	12	62	6879	18.4919	0.999958	0.688081	0.688081
	pathway	enrichment	pvalue	count	class
	Regulation of lipolysis in adipocytes	40.9464	8.05226e-05	4
	ABC transporters	39.0852	0.00212019	3
	cAMP signaling pathway	11.5808	0.00326698	4
	Estrogen signaling pathway	17.3712	0.0103626	3
	TNF signaling pathway	16.0724	0.01203	3
	Serotonergic synapse	15.4932	0.0129055	3
					Term	%	PValue	Count
					Regulation of lipolysis in adipocytes	0.333333	8.05226e-05	4
					ABC transporters	0.25	0.00212019	3
					cAMP signaling pathway	0.333333	0.00326698	4
					Estrogen signaling pathway	0.25	0.0103626	3
					TNF signaling pathway	0.25	0.01203	3
					Serotonergic synapse	0.25	0.0129055	3
