# Supplementary material for: Utilizing network pharmacology and experimental validation to investigate the underlying mechanism of phellodendrine on inflammation
Source: PeerJ. 2022 Sep 23;10:e13852. doi: 10.7717/peerj.13852 (PMC9512003; doi:10.7717/peerj.13852)
Supplement: Supplemental Information 6 [file peerj-10-13852-s006.xlsx]

## Sheet: Sheet1
	24小时														24h
	control	1+5	1+10	1+20	24h 1		control	1+5	1+10	1+20	24h 1				control	1+5	1+10	1+20	24h 1		control	1+5	1+10	1+20	24h 1
PTGS1	23.33	24.12	24.29	23.73	23.59	β-actin	14.85	14.69	14.74	14.69	13.96			HTR1A	26.5	25.55	26.78	24.71	25.05	β-actin	15.55	14.74	14.74	14.53	13.73
	23.35	23.8	23.99	23.71	23.59		14.61	14.64	14.71	14.66	13.93				26.59	25.67	26.81	24.64	25.16		15.52	14.63	14.58	14.04	13.85
	23.22	24.13	24.03	23.56	23.56		15.02	14.45	14.69	14.75	13.96				26.6	25.91	27.73	24.58	25.36		15.64	14.62	14.75	14.56	13.9
AKT1	24.39	25.02	25.12	24.49	24.49		14.85	14.69	14.74	14.57	13.96			PIK3CA	25.44	24.58	24.93	24.53	23.84		15.55	14.74	14.74	14.53	13.73
	24.47	24.76	24.99	24.67	24.36		14.61	14.64	14.71	14.66	13.93				24.96	24.68	25.01	24.42	24.27		15.52	14.63	14.58	14.04	13.85
	24.41	24.97	25.22	24.57	24.47		15.02	14.45	14.69	14.75	13.96				25.47	24.95	25.45	24.36	24.2		15.64	14.62	14.75	14.56	13.9
ADRB2	23.07	22.83	22.87	22.51	22.43		14.85	14.69	14.74	14.57	13.96			ptgs-2	22.47	19.92	19.61	19.6	20.03	β-actin	14.52	14.61	13.66	13.79	13.91
	23.09	22.9	23.14	22.36	22.31		14.61	14.64	14.71	14.66	13.93				22.43	20.17	19.67	19.6	20.06		14.69	14.59	13.81	13.87	13.92
	22.82	22.93	23.32	22.37	22.25		15.02	14.45	14.69	14.75	13.96				22.28	20.13	19.46	19.61	20.13		14.67	14.58	13.7	13.94	13.86
HSP90	16.44	16.69	17.11	16.81	17.32	β-actin	14.2	14.28	14.52	14.62	14.66
	16.61	16.67	16.92	16.44	17.29		14.32	14.58	14.48	14.44	14.67
	16.42	16.6	16.99	16.96	17.12		14.6	14.16	14.49	15.04	14.86
F10	22.31	22.66	24.27	22.86	23.88		14.2	14.28	14.52	14.62	14.66
	22.41	22.76	24.31	22.92	22.95		14.32	14.58	14.48	14.44	14.67
	22.24	23.1	23.84	22.83	23.85		14.6	14.16	14.49	15.04	14.86
															48h
	48小时														control	1+5	1+10	1+20	48h 1		control	1+5	1+10	1+20	48h 1
	control	1+5	1+10	1+20	24h 1		control	1+5	1+10	1+20	24h 1			HTR1A	26.05	26.79	25.76	26.41	26.76	β-actin	14.92	15.69	15.15	14.99	14.94
PTGS1	22.79	23.89	23.55	23.73	23.64	β-actin	14.62	14.63	14.47	14.86	14.75				26.07	27.43	25.74	26.16	26.64		14.99	15.79	15.06	15.15	15.02
	22.8	24.03	23.52	23.42	23.63		14.65	14.56	14.58	14.54	14.82				26.13	27.58	25.83	26.27	26.85		14.99	15.72	15.1	15.11	14.9
	22.71	23.87	23.48	23.21	23.6		14.66	14.65	14.53	14.39	14.77			PIK3CA	24.48	25.88	24.9	24.97	25.12		14.92	15.69	15.15	14.99	14.94
AKT1	24.34	25.3	24.93	24.79	25.11		14.62	14.63	14.47	14.86	14.75				24.61	25.76	24.88	25	25.35		14.99	15.79	15.06	15.15	15.02
	24.36	24.96	24.81	24.78	25.09		14.65	14.56	14.58	14.54	14.82				24.3	25.4	24.77	25.46	24.98		14.99	15.72	15.1	15.11	14.9
	24.27	25.36	24.79	24.47	24.77		14.66	14.65	14.53	14.39	14.77			ptgs-2	20.05	16.54	17.95	17.37	17.37	β-actin	15	14.63	15.23	15.13	15.92
ADRB2	22.79	23.45	23.55	22.87	23.31		14.62	14.63	14.47	14.86	14.75				19.96	16.41	17.98	17.37	17.3		15.02	14.61	15.26	15.12	15.64
	22.64	23.35	23.67	22.91	23.35		14.65	14.56	14.58	14.54	14.82				19.96	16.35	17.92	17.36	17.21		15.03	14.63	15.34	15.07	15.53
	22.58	23.45	23.19	22.9	23.42		14.66	14.65	14.53	14.39	14.77
HSP90	17.23	17.72	17.16	16.97	18.17	β-actin	15.36	15.09	14.46	14.65	15.79
	17.32	17.7	16.77	16.97	18.15		14.95	15.11	14.46	14.64	15.7
	17.22	17.62	17.04	16.95	18.22		15.58	15.55	14.64	14.55	15.89
F10	23.58	24	22.81	22.98	24.16		15.36	15.09	14.46	14.65	15.79
	23.07	24.23	22.79	23.23	24.36		14.95	15.11	14.46	14.64	15.7
	23.74	24.31	22.89	22.94	24.35		15.58	15.55	14.64	14.55	15.89
	72小时
	control	1+5	1+10	1+20	24h 1		control	1+5	1+10	1+20	24h 1				72h
PTGS1	23.17	24.73	26	25.02	24.95	β-actin	14.63	15.32	16.03	15.47	15.55				control	1+5	1+10	1+20	72h 1		control	1+5	1+10	1+20	72h 1
	23.42	24.8	25.68	25.07	24.98		14.85	15.39	16.04	15.47	15.55			HTR1A	25.4	26.12	27.58	26.62	25.75	β-actin	15.1	15.99	17.26	16.55	16.18
	23.19	24.83	25.71	24.98	24.97		14.65	15.53	16.36	15.69	15.67				25.59	26.49	28.08	26.65	25.86		15.25	16.07	17.36	16.53	16.49
AKT1	23.95	25.34	26.04	25.94	25.36		14.63	15.32	16.03	15.47	15.55				25.52	26.03	28.38	26.55	25.71		15.34	15.98	17.23	16.67	16.42
	23.99	25.15	25.97	25.83	25.44		14.55	15.39	16.04	15.47	15.55			PIK3CA	25.21	25.67	27.38	26.28	25.96		15.1	15.99	17.26	16.55	16.18
	23.96	25.8	25.96	25.98	25.69		14.65	15.53	16.36	15.69	15.67				25.72	25.88	27.39	26.35	25.98		15.25	16.07	17.36	16.53	16.49
ADRB2	22.94	23.66	24.97	24.19	23.86		14.63	15.32	16.03	15.47	15.55				25.12	25.51	27.15	25.96	25.84		15.34	15.98	17.23	16.67	16.42
	22.88	23.87	24.9	24.04	23.65		14.55	15.39	16.04	15.47	15.55			ptgs-2	19.85	16.75	18.45	18.33	17.95	β-actin	15.1	15.99	17.26	16.55	16.18
	23	23.86	24.4	24.09	23.89		14.65	15.53	16.36	15.69	15.67				19.96	16.79	18.22	18.34	17.99		15.25	16.07	17.36	16.53	16.49
HSP90	17.54	17.92	19	18.4	18.89	β-actin	14.63	15.25	16.02	15.6	16				19.89	16.8	18.34	18.32	17.94		15.34	15.98	17.23	16.67	16.42
	17.18	17.94	18.99	18.44	18.89		14.75	15.38	16.11	15.63	16.02
	17.3	17.99	18.94	18.24	18.86		15	15.52	16.25	16.11	16.38
F10	22.63	22.24	23.99	23.9	22.8		14.63	15.25	16.02	15.6	16
	22.58	22.35	24.1	23.88	22.87		14.75	15.38	16.11	15.63	16.02
	22.76	22.4	23.94	23.95	22.91		15	15.52	16.25	16.11	16.38
