# Supplementary material for: Utilizing network pharmacology and experimental validation to investigate the underlying mechanism of phellodendrine on inflammation
Source: PeerJ. 2022 Sep 23;10:e13852. doi: 10.7717/peerj.13852 (PMC9512003; doi:10.7717/peerj.13852)
Supplement: Supplemental Information 8 [file peerj-10-13852-s008.xlsx]

## Sheet: IL-1β
	groups
											IL-1B 24h	groups	IL-1B 48h	groups	72h1	groups1
48h	C	1	0.1	1+160	1+80	1+40	1+20	1+10	1+5		79.7544	1	93.498	1	6.34584	1
	93.498	168.63	147.556	144.807	126.941	99.9117	101.744	140.226	146.64		110.907	1	122.36	1	5.7603	1
	122.36	132.438	117.778	148.014	114.113	141.601	125.566	110.448	126.941		95.3305	1	105.867	1	4.93149	1
	105.867	124.65	113.655	111.823	108.158	131.98	109.532	117.778	93.0399		149.389	2	168.63	2	6.58214	1
			124.65								111.365	2	132.438	2	7.29414	2
average value	107.242	141.906	125.91	134.882	116.404	124.497	112.281	122.818	122.207		131.98	2	124.65	2	6.71452	2
	C	1	0.1	1+160	1+80	1+40	1+20	1+10	1+5		153.512	3	147.556	3	9.47271	2
24h	79.7544	149.389	153.512	126.483	144.349	122.36	115.03	99.9117	113.197		140.684	3	117.778	3	8.57667	2
	110.907	111.365	140.684	122.36	131.522	121.443	93.498	110.448	126.025		104.951	3	113.655	3	7.6145	2
	95.3305	131.98	104.951	113.197	90.2911	84.3356	98.0792	129.689	95.7886		126.483	4	124.65	3	5.58894	3
average value	95.3305	130.911	133.049	120.68	122.054	109.379	102.202	113.35	111.67		122.36	4	144.807	4	5.97625	3
											113.197	4	148.014	4	5.34956	3
											144.349	5	111.823	4	7.36687	4
72h	1+5	1+10	1+20	1+40	1+80	1+160	1	C			131.522	5	126.941	5	5.97625	4
	7.27005	8.8067	7.8444	6.2828	7.36687	5.58894	7.29414	6.34584			90.2911	5	114.113	5	7.05671	4
	6.43082	6.47372	4.8813	5.34956	5.97625	5.97625	6.71452	5.7603			122.36	6	108.158	5	5.27778	4
	7.71584	6.56032	5.36764	7.79272	7.05671	5.34956	9.47271	4.93149			121.443	6	99.9117	6	6.53857	4
				5.33153	5.27778		8.57667	6.58214			84.3356	6	141.601	6	6.2828	5
					6.53857		7.6145				115.03	7	131.98	6	5.34956	5
average value	7.13891	7.28025	6.03111	6.18915	6.44323	5.63825	7.93451	5.90494			93.498	7	101.744	7	7.79272	5
											98.0792	7	125.566	7	5.33153	5
											99.9117	8	109.532	7	7.8444	6
											110.448	8	140.226	8	4.8813	6
											129.689	8	110.448	8	5.36764	6
											113.197	9	117.778	8	8.8067	7
											126.025	9	146.64	9	6.47372	7
											95.7886	9	126.941	9	6.56032	7
													93.0399	9	7.27005	8
															6.43082	8
															7.71584	8

## Sheet: IL-6
	C	1	0.1	1+160	1+80	1+40	1+20	1+10	1+5
48h	29.0684	45.1614	41.6288	44.8997	32.3394	45.4231	48.694	38.3579	38.7504
	36.2645	39.5354	38.6195	38.0962	48.4323	46.4698	45.8156	33.9094	38.6195
	33.2552	40.7129	36.0028	40.1896	37.442	35.4795	31.4235	38.4887	32.2085
					35.6103	34.8253	34.1711
					29.8535						IL-6 24h	groups	IL-6 48h	groups	72h1	groups1
average value	32.8627	41.8032	38.7504	41.0618	36.7355	40.5494	40.026	36.9187	36.5261						29.0269	1
	C	1	0.1	1+160	1+80	1+40	1+20	1+10	1+5		29.5918	1	29.0684	1	30.0624	1
24h	29.5918	51.7033	44.3764	46.4698	36.657	29.1993	44.5072	43.853	34.3019		36.7878	1	36.2645	1	30.7419	1
	36.7878	38.7504	32.9935	35.4795	36.657	45.0306	44.1147	39.6662	34.1711		32.601	1	33.2552	1	29.8712	1
	32.601	42.6755	33.5169	33.3861	34.9561	42.6755	41.6288	40.4513	31.6852		51.7033	2	45.1614	2	21.6247	2
						41.8905					38.7504	2	39.5354	2	29.0269	2
average value	32.9935	44.3764	36.9623	38.4451	36.09	39.699	43.4169	41.3235	33.3861		42.6755	2	40.7129	2	22.7464	2
											44.3764	3	41.6288	3	23.7001	3
											32.9935	3	38.6195	3	27.6756	3
											33.5169	3	36.0028	3	17.9895	3
72h	1+5	1+10	1+20	1+40	1+80	1+160	1	C			46.4698	4	44.8997	4	20.8192	4
B	24.6161	25.4874	28.6599	23.1817	20.8192	23.7001	21.6247	29.0269			35.4795	4	38.0962	4	19.6651	4
C	26.1409	23.7001	24.694	35.3033	19.6651	27.6756	29.0269	30.0624			33.3861	4	40.1896	4	16.8748	4
D	24.7722	19.9162	31.6402	29.0269	16.8748	17.9895	22.7464	30.7419			36.657	5	32.3394	5	23.1817	5
E	26.8968							29.8712			36.657	5	48.4323	5	35.3033	5
F	26.0583										34.9561	5	37.442	5	29.0269	5
average value	25.6969	23.0345	28.3314	29.1706	19.1197	23.1217	24.466	29.9256			29.1993	6	35.6103	5	28.6599	6
											45.0306	6	29.8535	5	24.694	6
											42.6755	6	45.4231	6	31.6402	6
											41.8905	6	46.4698	6	25.4874	7
											44.5072	7	35.4795	6	23.7001	7
											44.1147	7	34.8253	6	19.9162	7
											41.6288	7	48.694	7	24.6161	8
											43.853	8	45.8156	7	26.1409	8
											39.6662	8	31.4235	7	24.7722	8
											40.4513	8	34.1711	7	26.8968	8
											34.3019	9	38.3579	8	26.0583	8
											34.1711	9	33.9094	8
											31.6852	9	38.4887	8
													38.7504	9
													38.6195	9
													32.2085	9
